# Supplementary material for: Copolymerization of lactide, epoxides and carbon dioxide: a highly efficient heterogeneous ternary catalyst system
Source: Royal Society of Chemistry journal article supplement (doi:10.1039/d0py01592j), 2021-01-01
Supplement: d0py01592j1.pdf [file d0py01592j1.pdf]

**Copolymerization of Lactide, Epoxides and Carbon Dioxide: Highly Efficient Heterogeneous Ternary Catalyst System**

Xiang Li<sup>a</sup>, Ranlong Duan<sup>b</sup>, Chenyang Hu<sup>b</sup>, Xuan Pang<sup>b\*</sup>, and Mingxiao Deng<sup>a\*</sup>

<sup>a</sup> Institute of Chemistry, Northeast Normal University, Changchun, 130024, PR China.

<sup>b</sup> Key Laboratory of Polymer Ecomaterials, Changchun Institute of Applied Chemistry, Chinese Academy of Sciences, Changchun 130022, PR China.

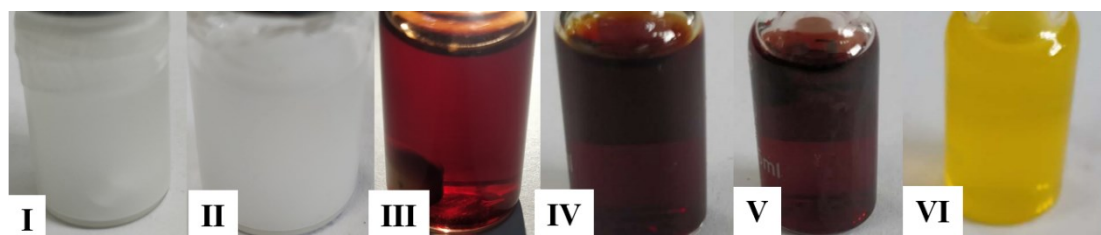

**Fig. S1** The different solubility of catalysts at room temperature (I: ZnGA; II: ZnGA at 60 °C after 0.5 hour; III: SalenCo<sup>II</sup>; IV: SalenCo<sup>II</sup>; V: SalenFe; VI: SalenAl).

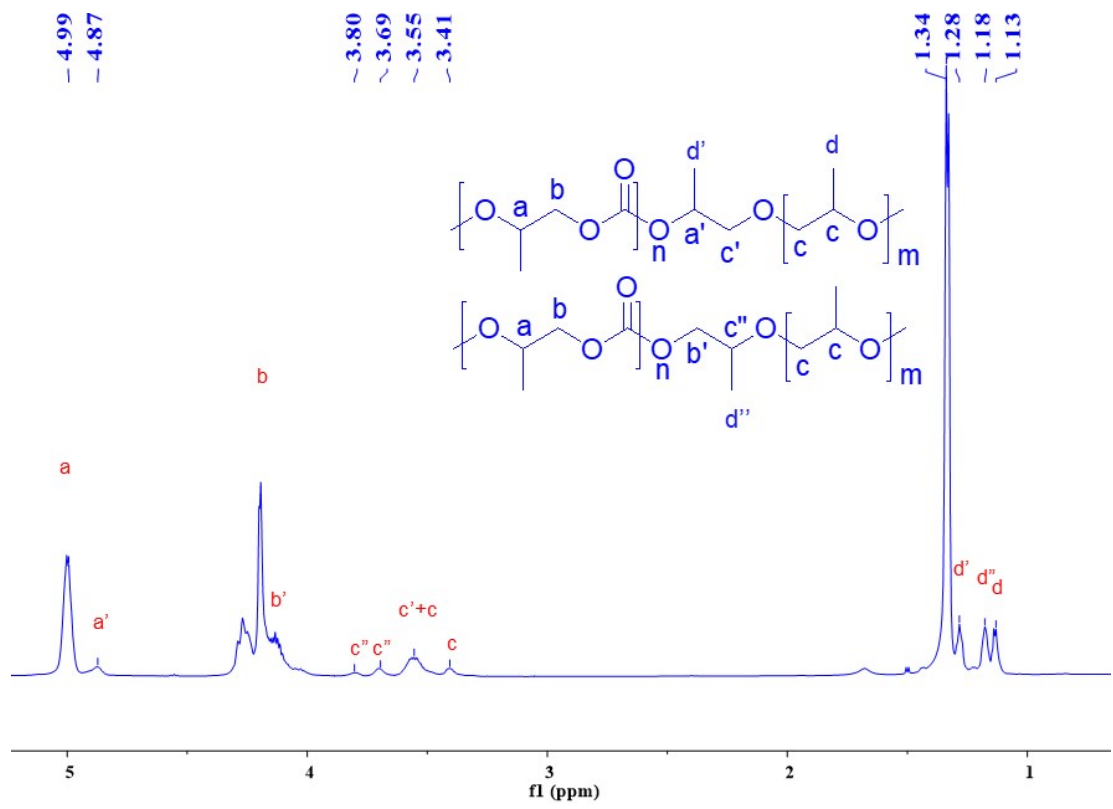

Fig. S2 The <sup>1</sup>H NMR spectrum of PPC<sub>2</sub> (Table 2, Entry 15), the PPO content is 7%.

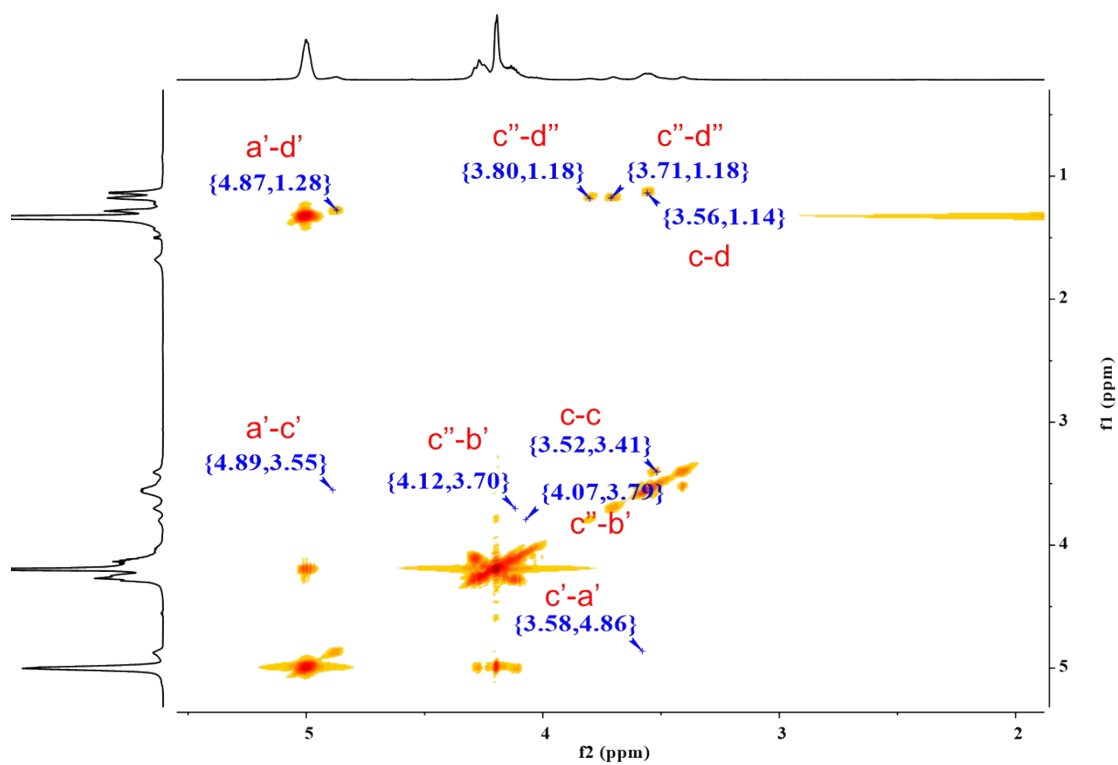

Fig. S3 The HH COSY NMR spectrum of PPC<sub>2</sub> (Table 1, Entry 4).

**Table S1.** The copolymerization of LLA, PO and CO<sub>2</sub>.

| Entry | 1 <sup>b</sup> | 4 <sup>b</sup> | PPNCI <sup>b</sup> | PO <sup>b</sup> | LLA <sup>b</sup> | Time (h) | Conv. <sub>1</sub> (%) <sup>c</sup> | Sel. <sub>1</sub> (%) <sup>c</sup> | Conv. <sub>2</sub> (%) <sup>c</sup> | Sel. <sub>2</sub> (%) <sup>c</sup> | PLA% <sup>c</sup> |
|-------|----------------|----------------|--------------------|-----------------|------------------|----------|-------------------------------------|------------------------------------|-------------------------------------|------------------------------------|-------------------|
| 1     | 1              | 50             | 2                  | 3500            | 500              | 1.5      | 9                                   | 52                                 | 18                                  | 1                                  | 38                |
| 2     | 1              | 50             | 2                  | 3500            | 500              | 2.5      | 12                                  | 63                                 | 17                                  | 1                                  | 40                |
| 3     | 1              | 50             | 2                  | 3500            | 500              | 3.5      | 18                                  | 82                                 | 41                                  | 1                                  | 44                |
| 4     | 1              | 50             | 2                  | 3500            | 500              | 6        | 24                                  | 89                                 | 67                                  | 1                                  | 46                |

(a) The reactions were performed in 2 mL neat PO in 25 mL autoclave at 60 °C, 2 MPa CO<sub>2</sub>. (b) Molar ratio. (c) Results based on the <sup>1</sup>H NMR spectroscopy. Con.<sub>1</sub> is for PO and Con.<sub>2</sub> is for LLA; Sel.<sub>1</sub> is for polycarbonates over all converted PO; Sel.<sub>2</sub> is for PPO over all converted PO.

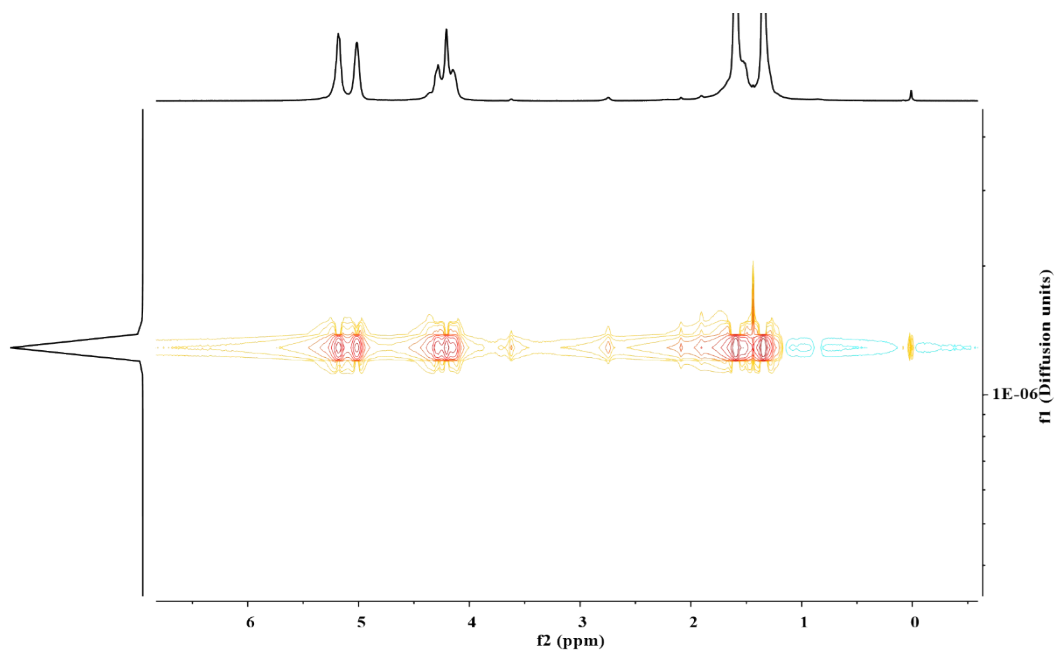

Fig.

Fig. S4 The  $^1\text{H}$  DOSY NMR spectrum of PLLAPC<sub>2</sub>.

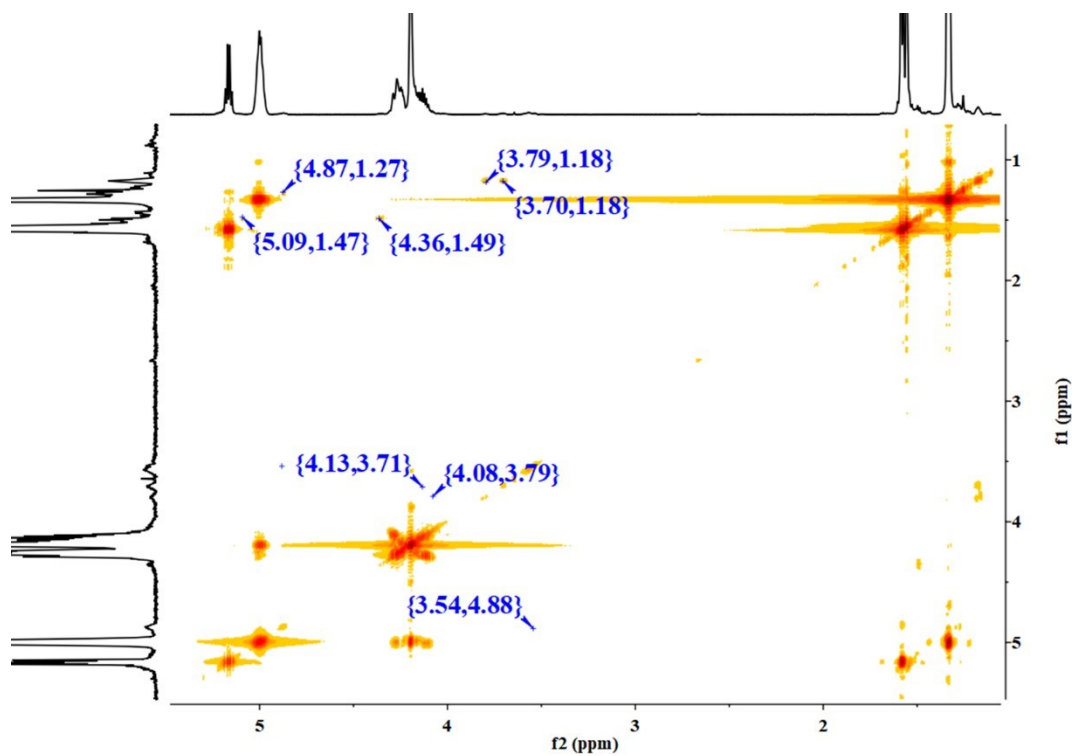

Fig. S5 The HH COSY NMR spectrum of PLLAPC<sub>2</sub>.

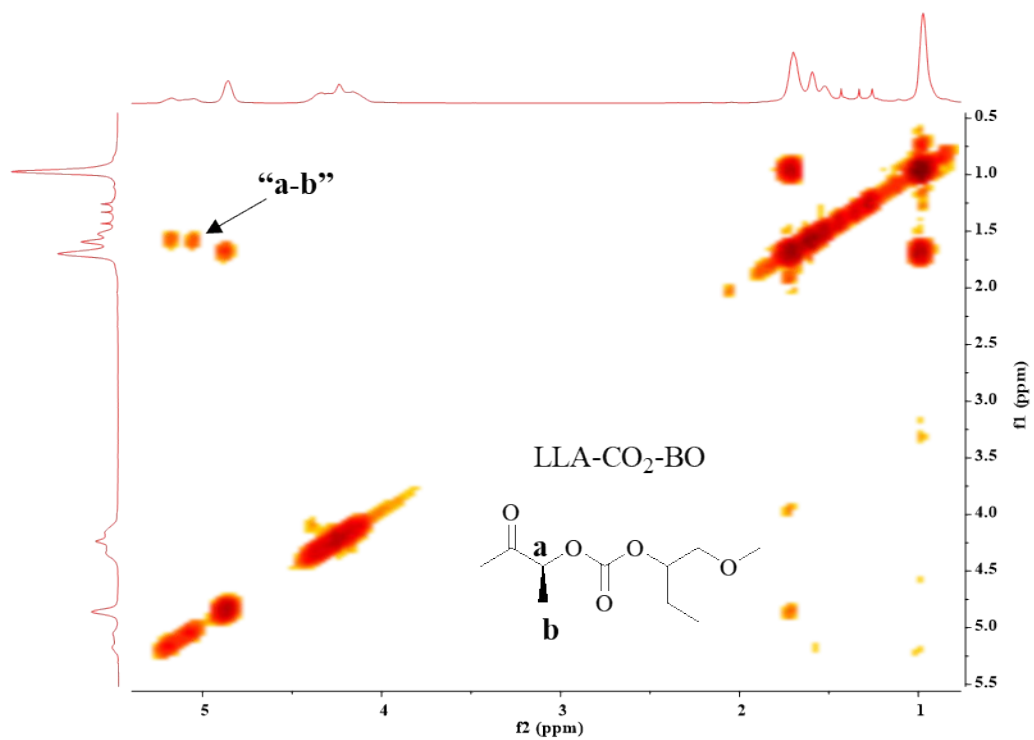

Fig. S6 The HH COSY NMR spectrum of PLLABC<sub>1</sub> (Table 2, Entry 17).



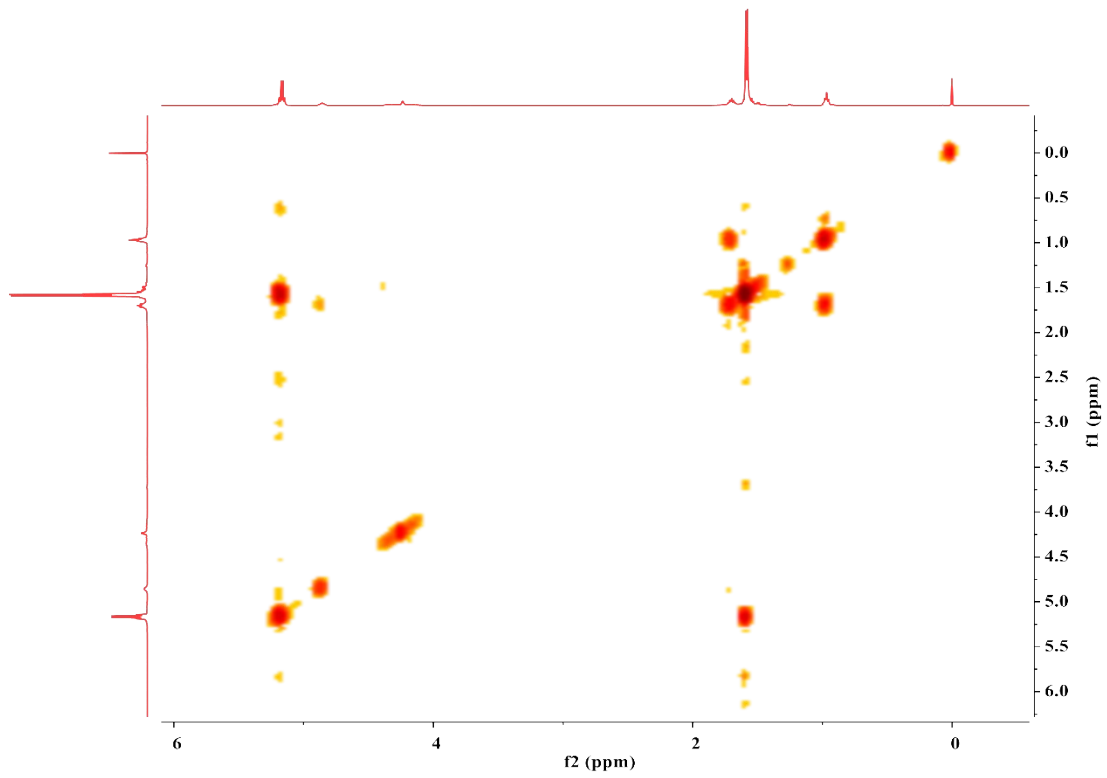

Fig. S7 The HH COSY NMR spectrum of PLLABC<sub>2</sub> (Table 2, Entry 18).

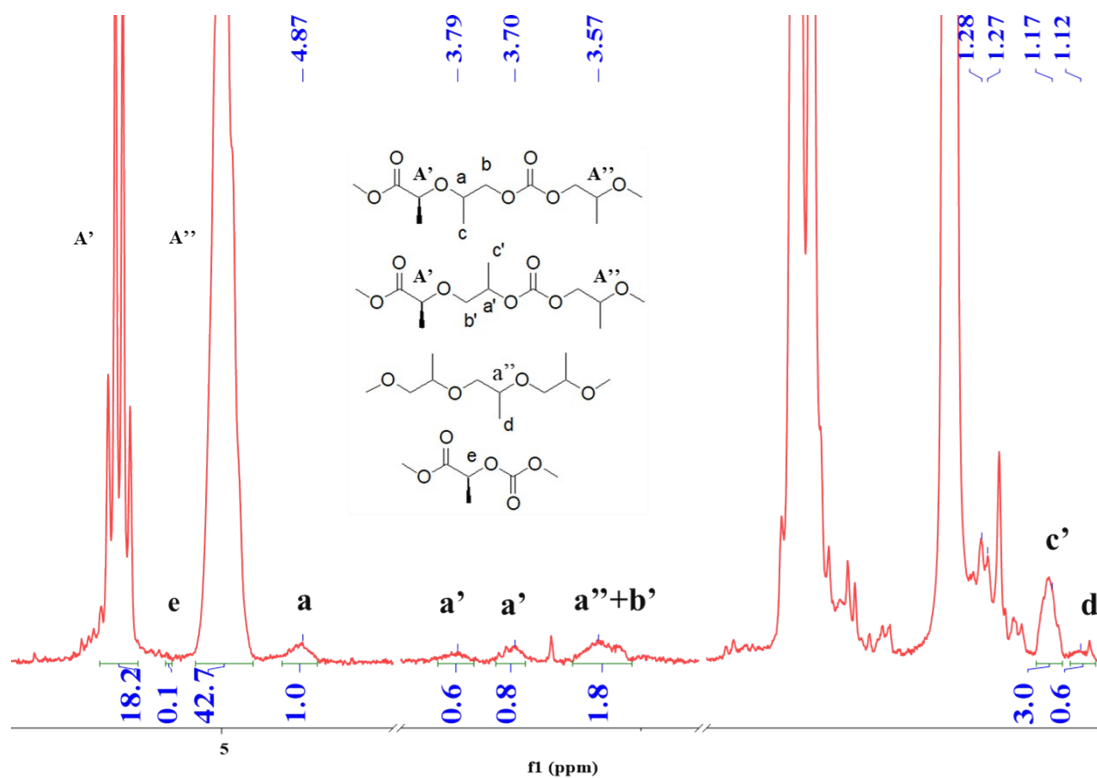

Fig. S8 The <sup>1</sup>H NMR spectrum of PLLAPC<sub>3</sub> (Table 2, Entry 20).

The average chain length of PPC blocks is 18 [ $I_{A''}/(I_a+I_{a'})$ ], the average chain length of PLLA blocks is 8 [ $I_{A'}/(I_a+I_{a'})$ ]. PLLAPC<sub>1</sub> has one  $T_g$ , while PLLAPC<sub>2</sub> has two  $T_g$ s, one crystal peak and one melting peak (Fig. S9). The thermo-decomposed temperature of PLLAPC<sub>2</sub> is 240 °C, which is higher than PPC<sub>2</sub> (219 °C) (Fig. S10). The mechanical property of PLLAPC<sub>2</sub> has been tested in comparison with commercial PLLA resin (Table S2). The dumbbell strip of PLLAPC<sub>2</sub> shows slight increase in elongation (from 4% to 6.5%) and decrease in tensile strength (from 65 MPa to 43 MPa).

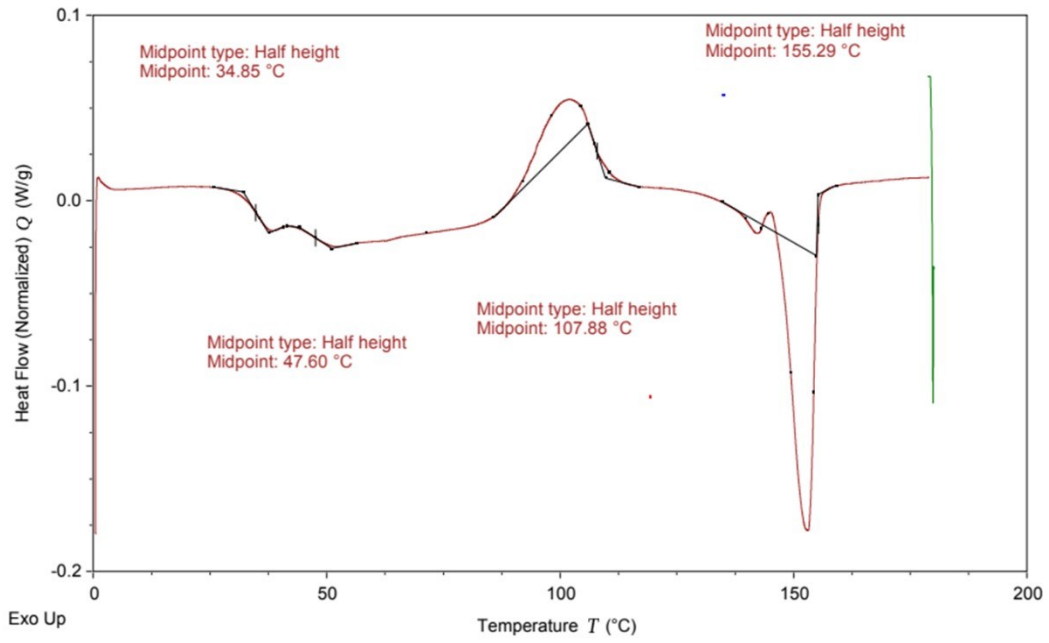

**Fig. S9** The DSC curve of PLLAPC<sub>2</sub> (Table 2, Entry 16), the second heat route. The PPO content is 6.6%, the average chain length of PPC blocks is 6, the average chain length of PLLA blocks is 9.

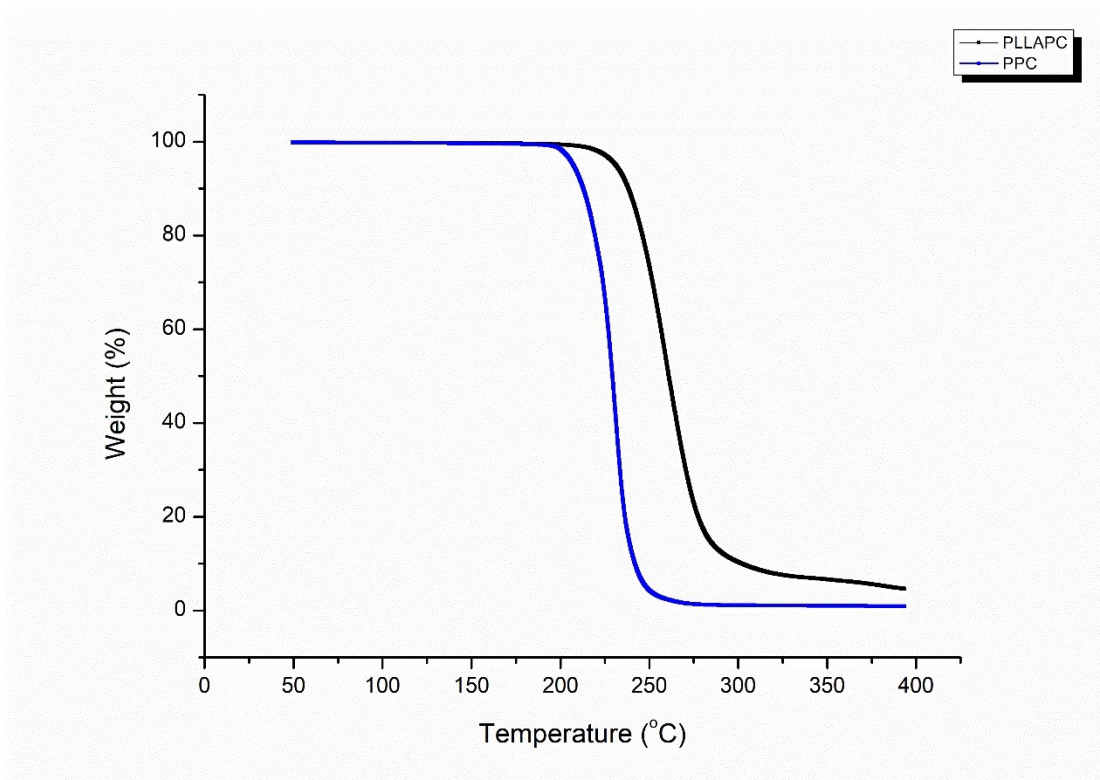

**Fig. S10** The TGA curves of PPC<sub>2</sub> and PLLAPC<sub>2</sub>.

**Table S2.** Mechanical properties of PLLA and PLLAPC<sub>2</sub> (Table 2, Entry 8).

| Sample <sup>d</sup> | $M_n^a$ (Kg/mol) | PDI <sup>a</sup> | EB <sup>b</sup> (%) | TS <sup>c</sup> (MPa) |
|---------------------|------------------|------------------|---------------------|-----------------------|
| PLLA                | 81.2             | 1.32             | 4                   | 65                    |
| PLLAPC <sub>2</sub> | 602.6            | 1.02             | 6.5                 | 43                    |

a. Determined by GPC measurements. b. Elongation at break. c. Tensile strength at yield. d. The average value of five sample.

PLLA, PLLAPC<sub>2</sub> were dried at 60 °C under vacuum for 12 h before use. The tensile properties were measured using an Instron 1211 machine (Instron Co., UK) at a crosshead speed of 20 mm\*min<sup>-1</sup>. The dumbbell-shaped samples for tensile testing were cut from the compression molded sheets, and the dimension of the samples was 20 \* 4 \* 1 mm<sup>3</sup>.

**Table S3.** The copolymerization of epoxides and CO<sub>2</sub>.<sup>a</sup>

| Entry          | Cat <sup>b</sup> | [Cat]:[PPNCl]:[PO]<br>] <sup>b</sup> | Time (h) | Conv. (%) <sup>c</sup> | Sel. (%) <sup>d</sup> | <i>M<sub>n</sub></i> <sup>e</sup> (Kg/mol) | PDI <sup>e</sup> |
|----------------|------------------|--------------------------------------|----------|------------------------|-----------------------|--------------------------------------------|------------------|
| 1 <sup>h</sup> | <b>1b</b>        | 1:1:2500                             | 24       | 25                     | 38/0 <sup>f</sup>     | 17.8                                       | 1.14             |
| 2 <sup>h</sup> | <b>(2+1b)</b>    | 50:1:2:2500                          | 24       | 20                     | 34/10 <sup>f</sup>    | 13.2                                       | 1.12             |
| 3 <sup>i</sup> | <b>2</b>         | 1:0:50                               | 19       | 5                      | 93/0 <sup>f</sup>     | 1.3                                        | 1.26             |
| 4 <sup>i</sup> | <b>(2+1b)</b>    | 50:1:1:1500                          | 23       | 17                     | 87/0                  | 11.0                                       | 1.18             |

(a) The reactions were performed in 2 mL neat BO or CHO in 25 mL autoclave at 60 °C, 2 MPa CO<sub>2</sub>. (b) Molar ratio. (c) Results based on the <sup>1</sup>H NMR spectroscopy. (d) Selectivity for polycarbonates over other converted PO, determined by <sup>1</sup>H NMR spectroscopy. (e) Determined by gel permeation chromatography, calibrated with polystyrene. (f) Selectivity for polycarbonate/Selectivity for polyether. (g) Under 0.2 MPa CO<sub>2</sub>. (h) Using butylene oxide (BO) instead of PO. (i) Using CHO instead of PO.

**Table S4.** The polymerization of LLA, CHO and CO<sub>2</sub>.

| Entry | 1 <sup>b</sup> | 2 <sup>b</sup> | PPNCl <sup>b</sup> | CHO <sup>b</sup> | LLA <sup>b</sup> | Time (h) | Con. (%) <sup>c</sup> | Sel. (%) <sup>c</sup> |
|-------|----------------|----------------|--------------------|------------------|------------------|----------|-----------------------|-----------------------|
| 1     | 1              | 40             | 1                  | 2000             | 150              | 20 h     | 53                    | 0                     |
| 2     | -              | 1              | 0.05               | 50               | -                | 20 h     | 5                     | 0                     |
| 3     | 1              | 100            | 1                  | 2000             | -                | 20 h     | 67                    | 0                     |

(a)The reactions were performed in 2 mL neat PO in 25 mL autoclave at 60 °C, 2 MPa CO<sub>2</sub>. (b) Molar ratio. (c)Results based on the <sup>1</sup>H NMR spectroscopy. Con.: the ratio of converted CHO; Sel.: polyether over other converted CHO.

Interestingly, different epoxides may undergo different paths for copolymerization of LLA, epoxide and CO<sub>2</sub> even using the same TCS<sub>2</sub>. The copolymerization of butylene oxide (BO) and CO<sub>2</sub> shows similar results as PO and CO<sub>2</sub> (Table S3, Entries 1 and 2). However, when we used CHO instead of PO, neither ZnGA nor TCS<sub>2</sub> could catalyze the sequential ROP of CHO (Table S4, Entries 2 and 3). As the structure of PLLAPC<sub>2</sub> and PLLABC<sub>2</sub> is similar, it was believed that they are synthesized via same copolymerization mechanism (Fig. 3). PO and BO are terminal epoxides, by contrast, CHO is internal epoxide. The experiments that using CHO instead of PO show different results, ZnGA or TCS<sub>2</sub> could not catalyze the sequential ROP of CHO (Table S3, Entries 3 and 4), which we suggest is pre-requisite for the synthesis of the “LLA-epoxide-CO<sub>2</sub>” linkages. So in the LLA/CHO/CO<sub>2</sub> copolymerization, LLA-CHO-CO<sub>2</sub> linkages could not be synthesized by TCS<sub>2</sub>. The PLLACHC<sub>2</sub> shows the same microstructure as PLLACHC<sub>1</sub>, so we regard TCS<sub>2</sub> catalyzed the copolymerization of LLA/CHO/CO<sub>2</sub> via the same way as TCS<sub>1</sub>.

**Table S5.** The polymerization of LLA in PO by ZnGA.

| Entry | 1 <sup>b</sup> | 2 <sup>b</sup> | PPNCI <sup>b</sup> | PO <sup>b</sup> | LLA <sup>b</sup> | Time (h) | Con. <sub>1</sub> (%) <sup>c</sup> | Con. <sub>2</sub> (%) <sup>c</sup> | PLA% <sup>c</sup> | M <sub>n</sub> <sup>d</sup> | PDI <sup>d</sup> |
|-------|----------------|----------------|--------------------|-----------------|------------------|----------|------------------------------------|------------------------------------|-------------------|-----------------------------|------------------|
| 1     | -              | 100            | -                  | 7500            | 1100             | 20 h     | 41                                 | 100                                | 42                | 9400                        | 1.18             |
| 2     | -              | 100            | 1                  | 7500            | 1100             | 20 h     | 7                                  | 100                                | 81                | 7900                        | 1.15             |
| 3     | 1              | 100            | 1                  | 3000            | 450              | 20 h     | 22                                 | 100                                | 75                | 12600                       | 1.14             |
| 4     | 1              | 10             | 1                  | 3000            | 450              | 20 h     | 20                                 | 72                                 | 83                | 10500                       | 1.14             |
| 5     | 1              | -              | 1                  | 2500            | 250              | 2 h      | -                                  | 66                                 | 100               | 5600                        | 1.10             |

(a)The reactions were performed in 2 mL neat PO in 25 mL autoclave at 60 °C. (b) Molar ratio. (c)Results based on the <sup>1</sup>H NMR spectroscopy, Con.<sub>1</sub> is for PO and Con.<sub>2</sub> is for LLA. (d) Determined by gel permeation chromatography, calibrated with polystyrene.



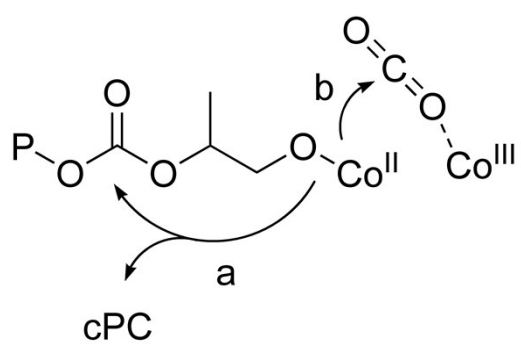

Fig. S11 The “back-biting” reaction (a) and the intermolecular cooperation (b).

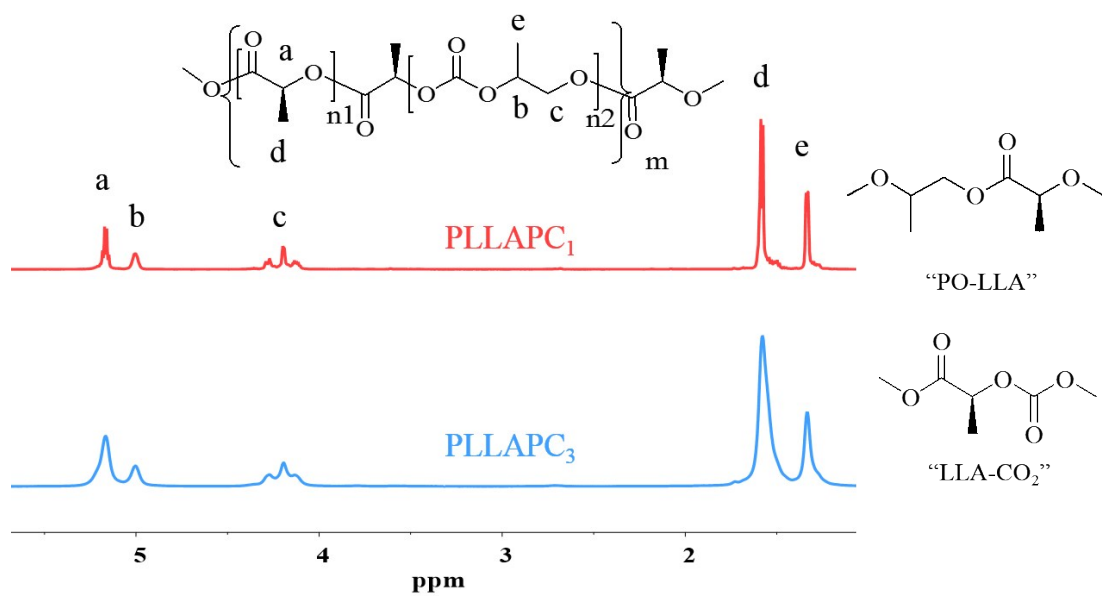

Fig. S12 <sup>1</sup>H NMR spectrum of PLLAPC<sub>1</sub> (synthesized by TCS<sub>1</sub>) and PLLAPC<sub>3</sub> (synthesized by TCS<sub>3</sub>).

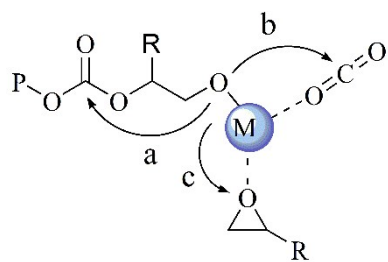

**Fig. S13** The catalytic selectivity for epoxide and CO<sub>2</sub> copolymerization.

**Table S6.** The terpolymerization of PO/LLA/CO<sub>2</sub>.<sup>a</sup>

| Entry          | Cat <sub>1</sub> <sup>b</sup> | Cat <sub>2</sub> <sup>b</sup> | PPNCl <sup>b</sup> | PO <sup>b</sup> | LLA <sup>b</sup> | Time (h) | Conv. <sub>1</sub> (%) <sup>c</sup> | Sel. <sub>1</sub> (%) <sup>c</sup> | Conv. <sub>2</sub> (%) <sup>c</sup> | Sel. <sub>2</sub> (%) <sup>c</sup> | PLA % <sup>c</sup> | M <sub>n</sub> <sup>d</sup> | PDI <sup>d</sup> |
|----------------|-------------------------------|-------------------------------|--------------------|-----------------|------------------|----------|-------------------------------------|------------------------------------|-------------------------------------|------------------------------------|--------------------|-----------------------------|------------------|
| 1 <sup>e</sup> | 1                             | 1                             | 1                  | 2500            | 250              | 48       | 50                                  | 86                                 | 100                                 | 0                                  | 68                 | 13600                       | 1.40             |
| 2 <sup>f</sup> | 1                             | 1                             | 1                  | 2500            | 150              | 20       | 17                                  | 55                                 | 95                                  | 0                                  | 74                 | 8500                        | 1.13             |
| 3 <sup>g</sup> | 1                             | 1                             | 1                  | 2500            | 150              | 48       | 34                                  | 12                                 | 90                                  | 0                                  | -                  | -                           | -                |

(a) The reactions were performed in 2 mL neat PO in 25 mL autoclave at 60 °C, 2 MPa CO<sub>2</sub>, employing **1b** as Cat<sub>1</sub>. (b) Molar ratio. (c) Results based on the <sup>1</sup>H NMR spectroscopy. Con.<sub>1</sub> is for PO and Con.<sub>2</sub> is for LLA; Sel.<sub>1</sub> is for polycarbonates over all converted PO; Sel.<sub>2</sub> is for PPO over all converted PO. (d) Determined by gel permeation chromatography, calibrated with polystyrene. (e) Employing **1a** as Cat.<sub>2</sub>. (f) Employing **2** as Cat.<sub>2</sub>. (g) Employing **3** as Cat.<sub>2</sub>.

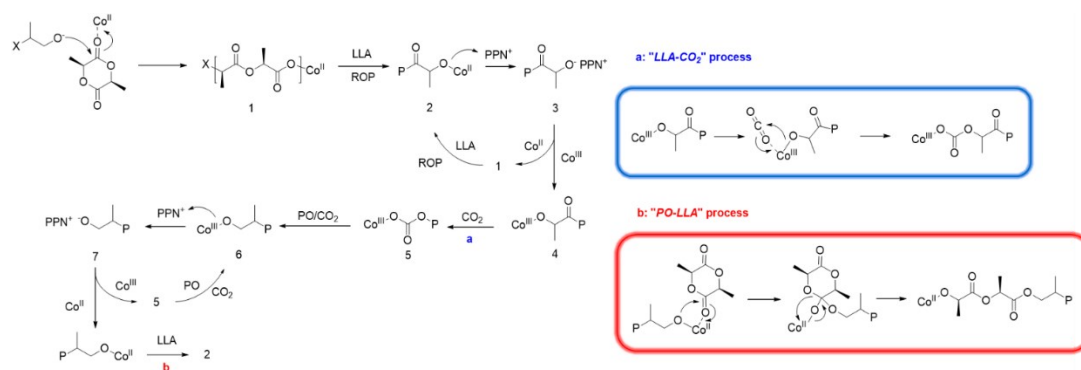

**Fig. S14** The conjectural chain propagation circle for TCS1 in previous article.

In our previous work of TCS<sub>1</sub>, we suggest that SalenCo<sup>III</sup> worked for the ROCOP of PO/CO<sub>2</sub>, while SalenCo<sup>II</sup> worked for the ROP of LLA (Fig. S14). The ROP and ROCOP processes are catalyzed simultaneously, and combined by the intermolecular chain transfer. However, this conjecture about the intermolecular cooperation mechanism is not perfect, the synthesis route of “LLA-CO<sub>2</sub>” linkage is more complex than we have anticipated. The perception about the copolymerization of LLA/PO/CO<sub>2</sub> is further ameliorated as we investigated more homogeneous ternary catalyst systems. We suggest that SalenCo<sup>II</sup> could synthesize the “LLA-CO<sub>2</sub>” linkage by itself: the growing PLLA chain could directly attack CO<sub>2</sub> on SalenCo<sup>II</sup>, resulting the formation of “LLA-CO<sub>2</sub>” linkage (Fig. S15, step a). When employing SalenCo<sup>II</sup> (SalenAl or SalenFe) separately in catalyzing the LLA/PO/CO<sub>2</sub> copolymerization, there is a little production of PPC (<0.1%) besides the creation of cPC. Firstly, we regarded the PPC was created by SalenCo<sup>III</sup>, which is inevitably mixed in the synthesis process of SalenCo<sup>II</sup>. However, when employing SalenAl or SalenFe, the little creation of PPC was also observed after long reaction time (Table S6). Therefore, we infer that SalenCo<sup>II</sup> (SalenAl or SalenFe) could synthesize the “LLA-CO<sub>2</sub>” linkage by themselves. The growing PLLA chain could directly attack CO<sub>2</sub> on SalenCo<sup>II</sup> (SalenAl or SalenFe), resulting the formation of “LLA-CO<sub>2</sub>” linkage (Fig. S15, step a). Although PO could be ring-opened after the CO<sub>2</sub>-insertion step, the following “back-biting” reaction leads to the creation of cPC which prevents SalenCo<sup>II</sup> to consecutively catalyze the ROCOP of PO/CO<sub>2</sub> (Fig. S15, step c). So the main products are PLLA and cPC when employing SalenCo<sup>II</sup> (SalenAl or SalenFe). For the ternary catalyst systems, the intermolecular chain transfer would replace the “back-biting” reaction (Fig. S15, step c’), similar as in catalyzing the PO/CO<sub>2</sub> copolymerization (Fig. S13). This suggestion is consistent with that PLLA could not induce the PO/CO<sub>2</sub> copolymerization on SalenCo<sup>III</sup> as a macroinitiator, and the ROP of LLA would be terminated by the addition of CO<sub>2</sub> (Table S7). As reported, SalenCo<sup>III</sup> could provide PPO under low pressure CO<sub>2</sub> (Table 1, Entry 4),<sup>2</sup> and SalenCo<sup>III</sup> could also catalyze the copolymerization of LLA/PO/CO<sub>2</sub> under 0.2 Mpa CO<sub>2</sub> (Table 2, Entry 3), which means TCS<sub>1</sub> could also act via mechanism showed in Fig. 3.

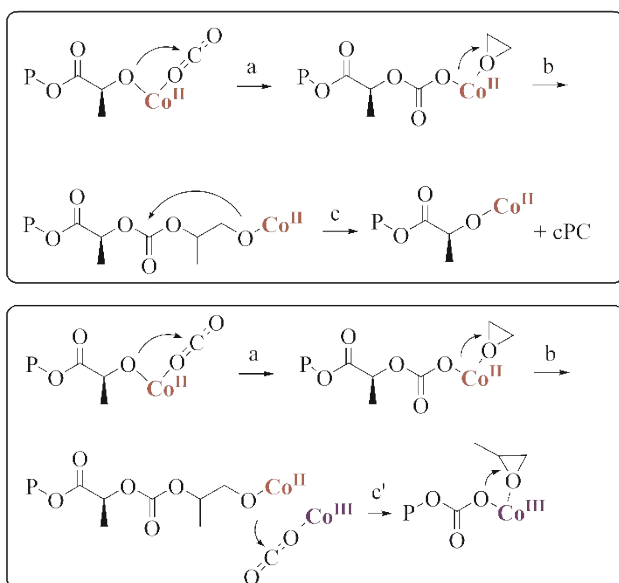

**Fig. S15** Revised chain propagation circle for TCS<sub>1</sub> in catalyzing the copolymerization of LLA, PO and CO<sub>2</sub>.

**Table S7.** The copolymerization of LLA, PO and CO<sub>2</sub>.<sup>a</sup>

| Entry | Cat. <sup>b</sup> | [Cat]:[PPNCl]:[PO]:[LLA] <sup>b</sup> | Time<br>(g) | Con. <sub>PO</sub><br>(%) <sup>c</sup> | Sel.<br>(%) <sup>c</sup> | Con. <sub>LLA</sub><br>(%) <sup>c</sup> |
|-------|-------------------|---------------------------------------|-------------|----------------------------------------|--------------------------|-----------------------------------------|
| 1     | 3a                | 1:1:4000:400                          | 48          | 8                                      | 61                       | 95                                      |
| 2     | 3b                | 1:1:2500:250                          | 48          | 4                                      | 25                       | 95                                      |

(a) The reactions were performed in 2 mL neat PO in 5 mL autoclave at 60 °C, 2 MPa CO<sub>2</sub>, employing **1b** as Cat<sub>1</sub>. (b) Molar ratio. (c) Results based on the <sup>1</sup>H NMR spectroscopy. Sel. is for polycarbonates over all converted PO.

**Table S8.** The polymerization of LLA.

| Step           | Cat <sup>b</sup> | PPNC <sup>b</sup> | PO <sup>b</sup> | LLA <sup>b</sup> | Time (h) | Con. <sub>1</sub> (%) <sup>c</sup> | Sel. (%) <sup>c</sup> | Con. <sub>2</sub> (%) <sup>c</sup> |
|----------------|------------------|-------------------|-----------------|------------------|----------|------------------------------------|-----------------------|------------------------------------|
| 1              | 1                | 1                 | 3500            | 350              | 6        | -                                  | -                     | 47                                 |
| 2 <sup>d</sup> | 1                | 1                 | 3500            | 350              | 18       | -                                  | -                     | 47                                 |

(a) The reactions were performed in 2 mL neat PO in 5 mL autoclave at 60 °C, employing **1b** as Cat. (b) Molar ratio. (c) Results based on the <sup>1</sup>H NMR spectroscopy. Con.<sub>1</sub> is for PO and Con.<sub>2</sub> is for LLA; Sel. is for polycarbonates over all converted PO. (d) Adding 2 MPa CO<sub>2</sub>.



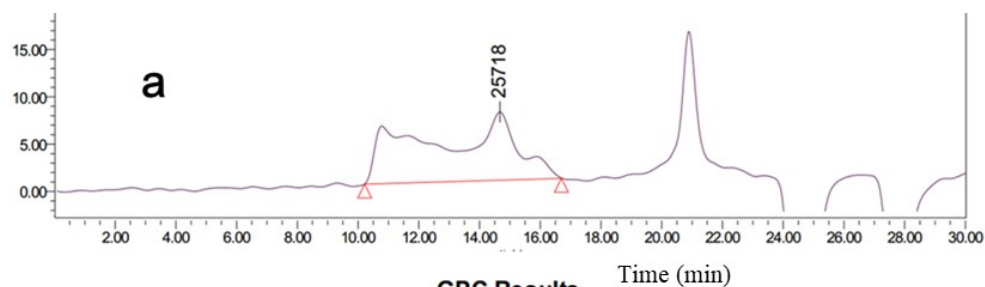

**GPC Results**

| Dist Name | Elution Volume (ml) | Retention Time (min) | Adjusted RT (min) | Mn    | Mw     | MP    | Mz     | Mz+1   | Mz/Mw    | Mz+1/Mw  |
|-----------|---------------------|----------------------|-------------------|-------|--------|-------|--------|--------|----------|----------|
| 1         | 14.669              | 14.669               | 14.669            | 40624 | 134902 | 25718 | 308316 | 410885 | 2.285483 | 3.045811 |

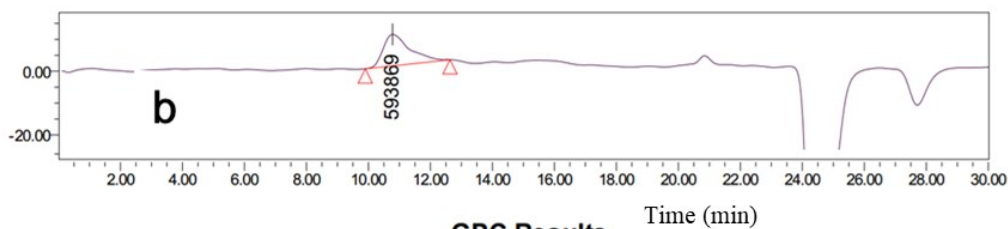

**GPC Results**

| Dist Name | Elution Volume (ml) | Retention Time (min) | Adjusted RT (min) | Mn     | Mw     | MP     | Mz     | Mz+1   | Mz/Mw    |
|-----------|---------------------|----------------------|-------------------|--------|--------|--------|--------|--------|----------|
| 1         | 10.779              | 10.779               | 10.779            | 339714 | 393525 | 593869 | 436822 | 468796 | 1.110022 |

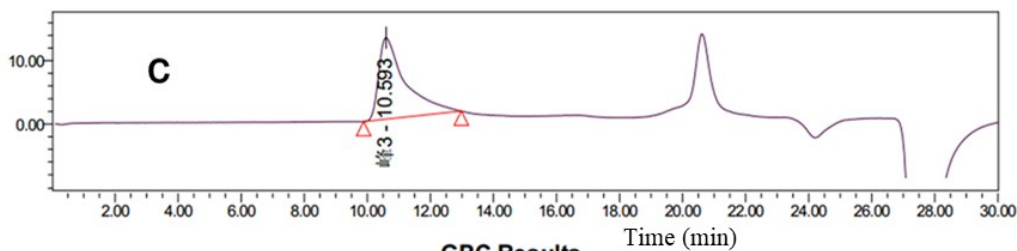

**GPC Results**

| Dist Name | Elution Volume (ml) | Retention Time (min) | Adjusted RT (min) | Mn     | Mw     | MP     | Mz     | Mz+1     | Mz/Mw    | Mz+1/Mw |
|-----------|---------------------|----------------------|-------------------|--------|--------|--------|--------|----------|----------|---------|
| 1         | 10.593              | 10.593               | 10.593            | 322125 | 379639 | 428369 | 465181 | 1.128360 | 1.225325 |         |

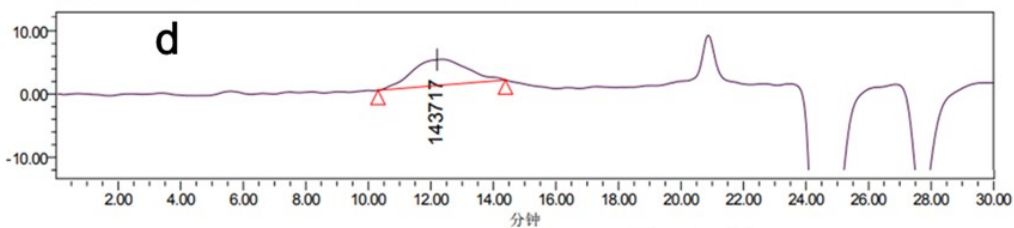

**GPC Results**

| Dist Name | Elution Volume (ml) | Retention Time (min) | Adjusted RT (min) | Mn     | Mw     | MP     | Mz     | Mz+1   | Mz/Mw    |
|-----------|---------------------|----------------------|-------------------|--------|--------|--------|--------|--------|----------|
| 1         | 12.209              | 12.209               | 12.209            | 110907 | 164661 | 143717 | 237092 | 312449 | 1.439878 |

Fig. S16 The GPC curves in CH<sub>2</sub>Cl<sub>2</sub>, a: mixture, b, c, and d: PLLAPC<sub>2</sub>.

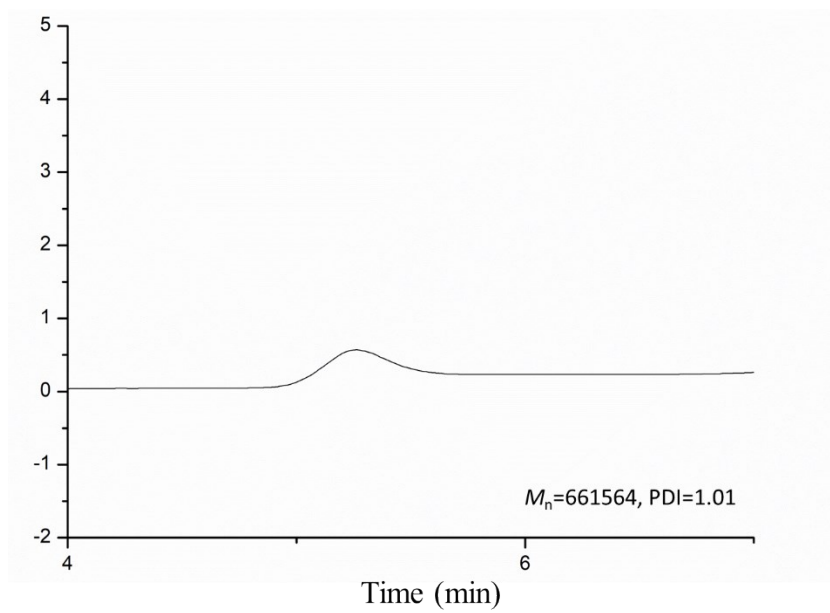

**Fig. S17** The GPC curve in THF (Table 2, Entry 11) .

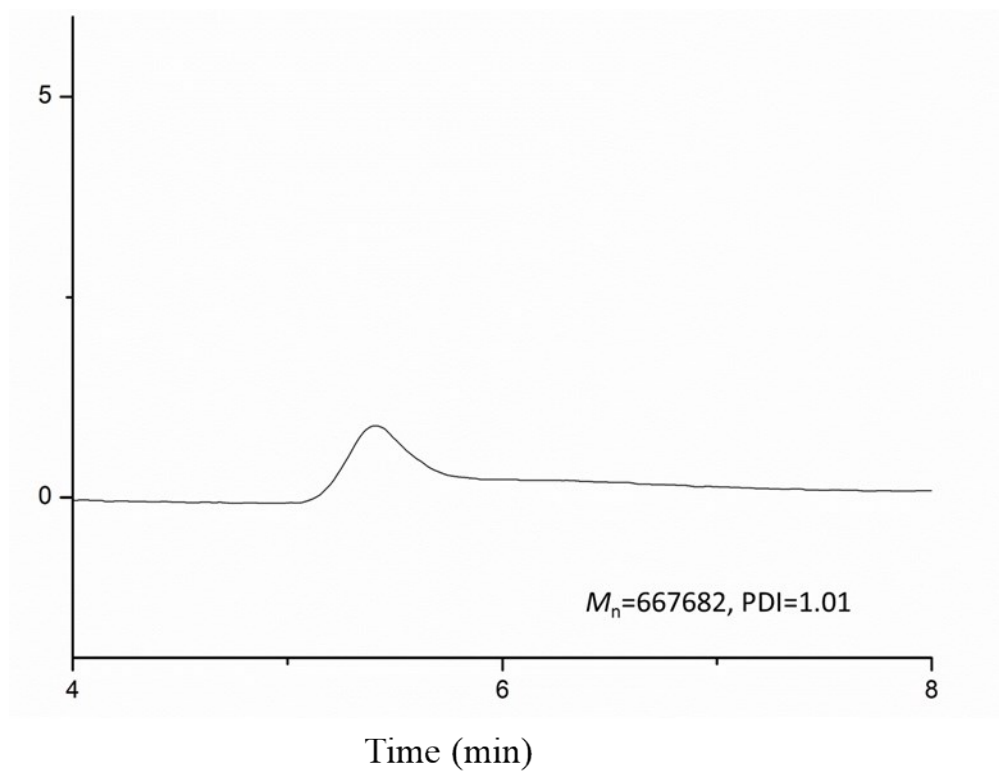

**Fig. S18** The GPC curve in THF (Table 2, Entry 11).

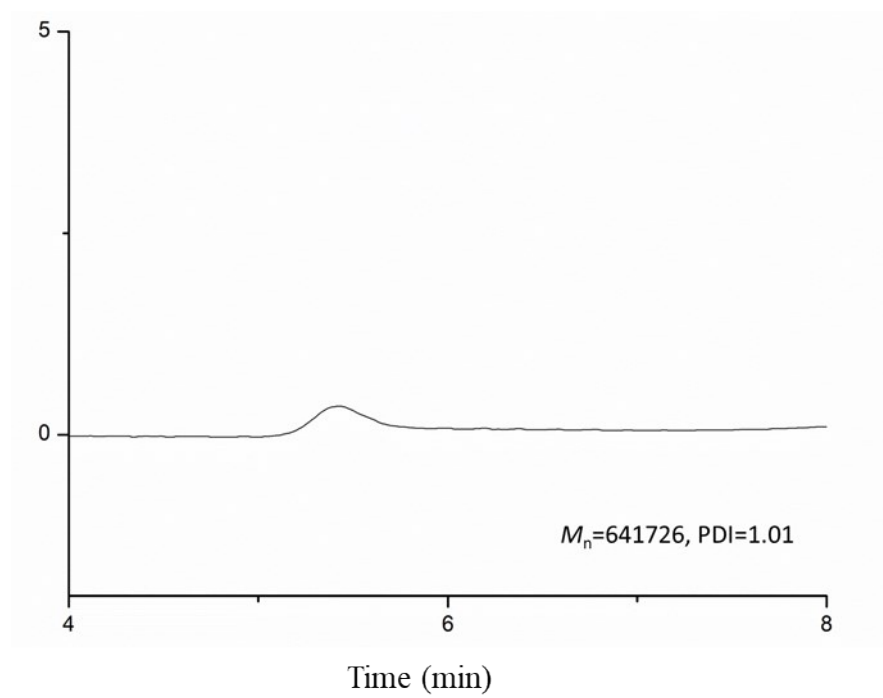

**Fig. S19** The GPC curve in THF (Table 2, Entry 9).

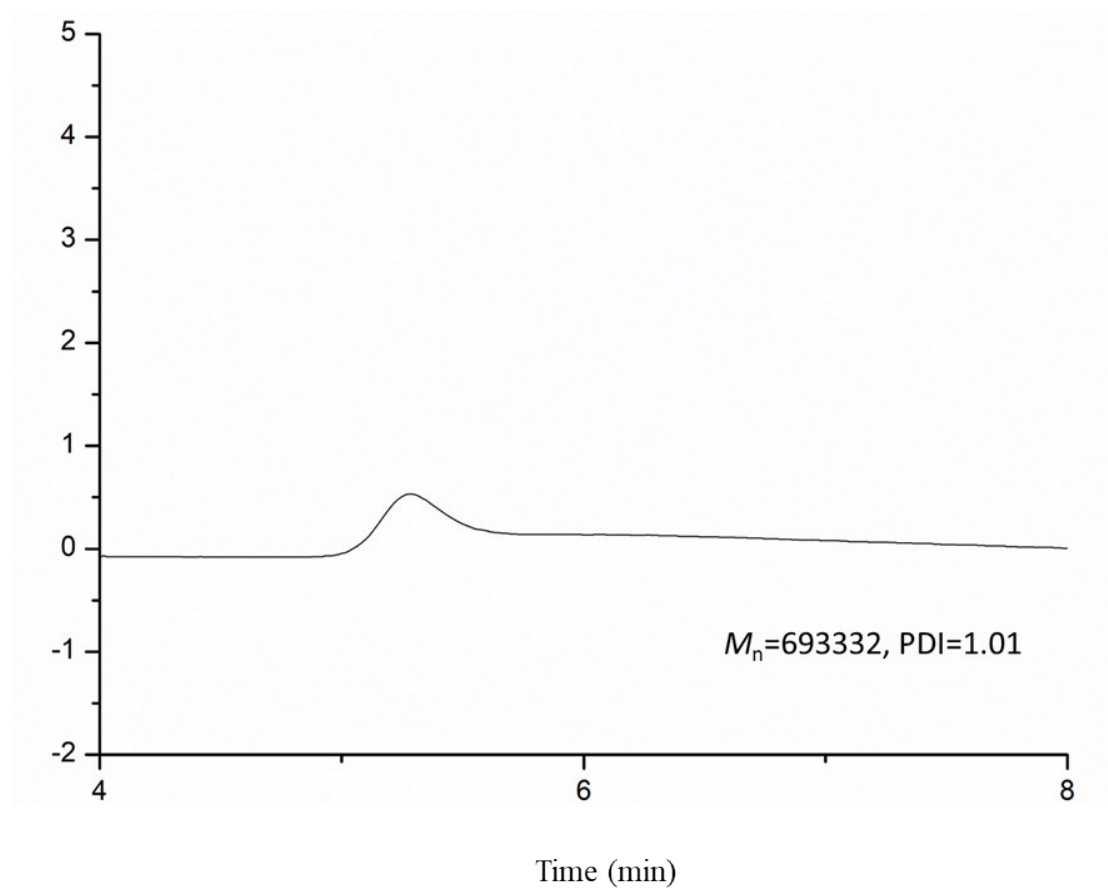

Fig. S20 The GPC curve in THF (Table 2, Entry 9).

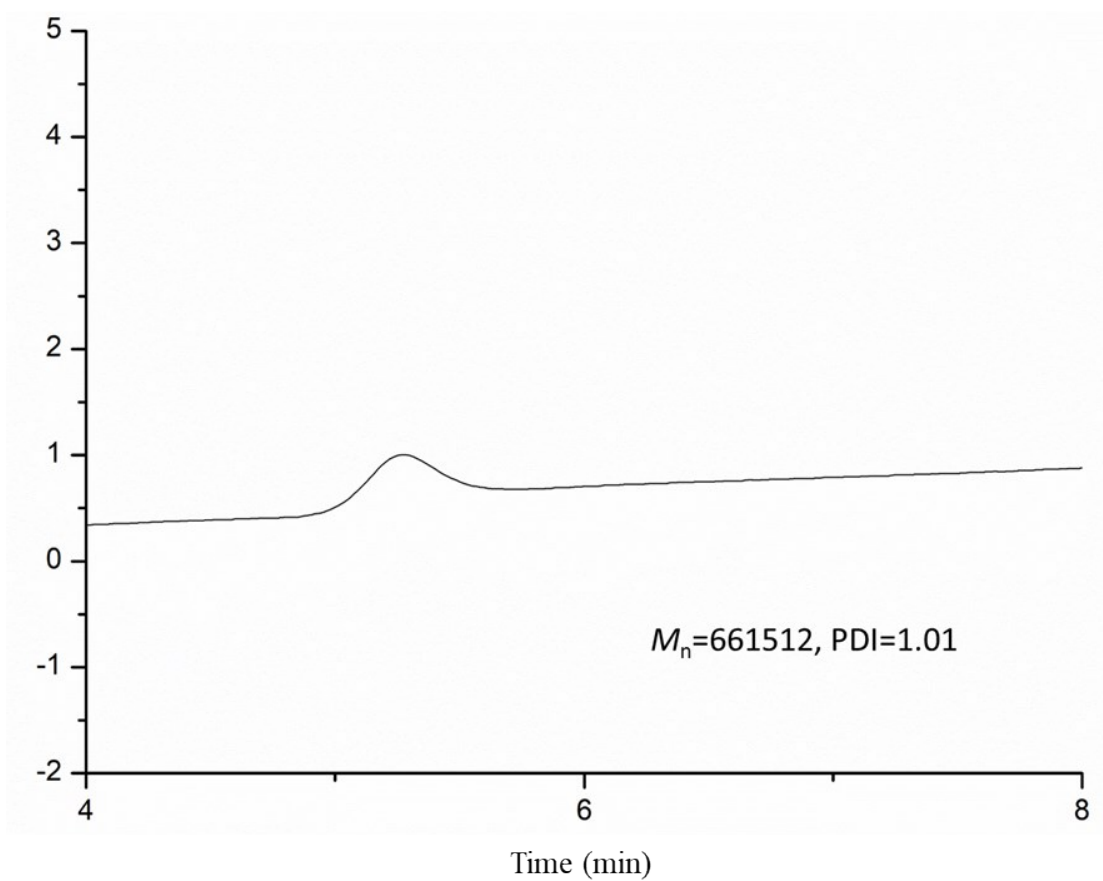

Fig. S21 The GPC curve in THF (Table 2, Entry 11).

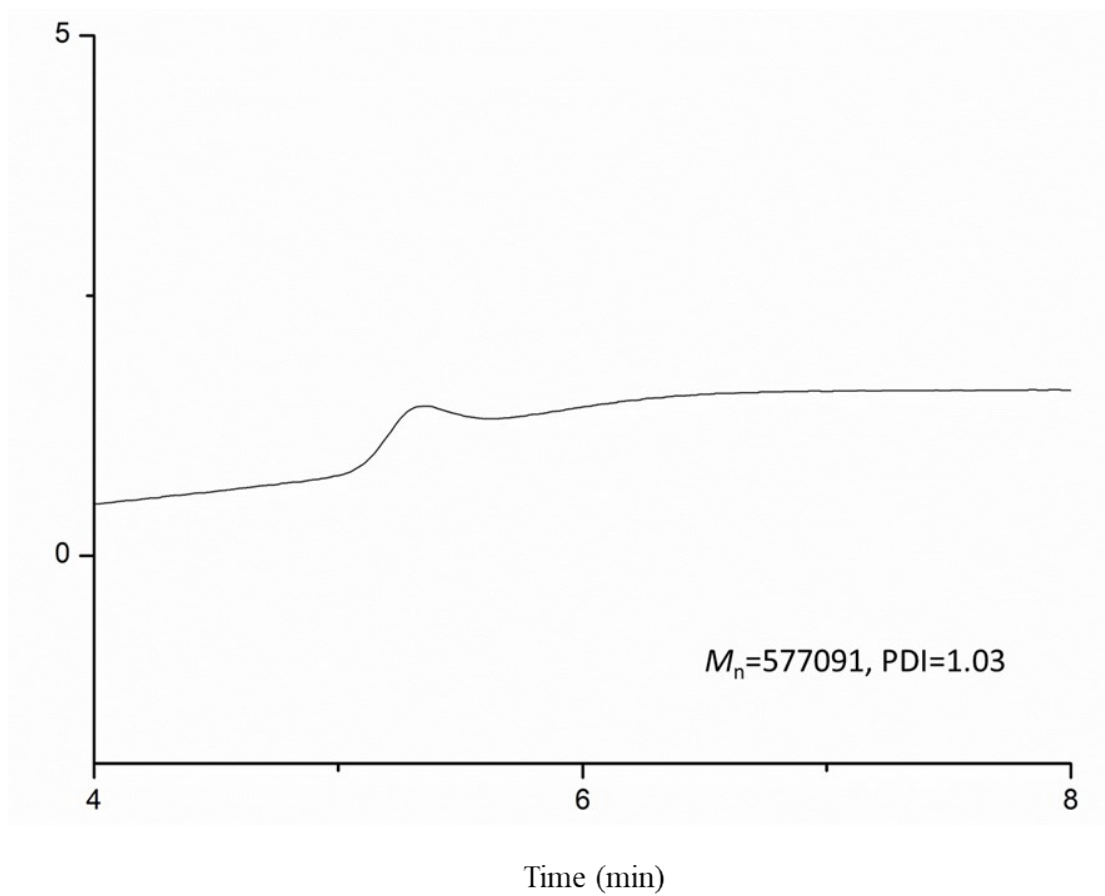

Fig. S22 The GPC curve in THF (Table 2, Entry 12).

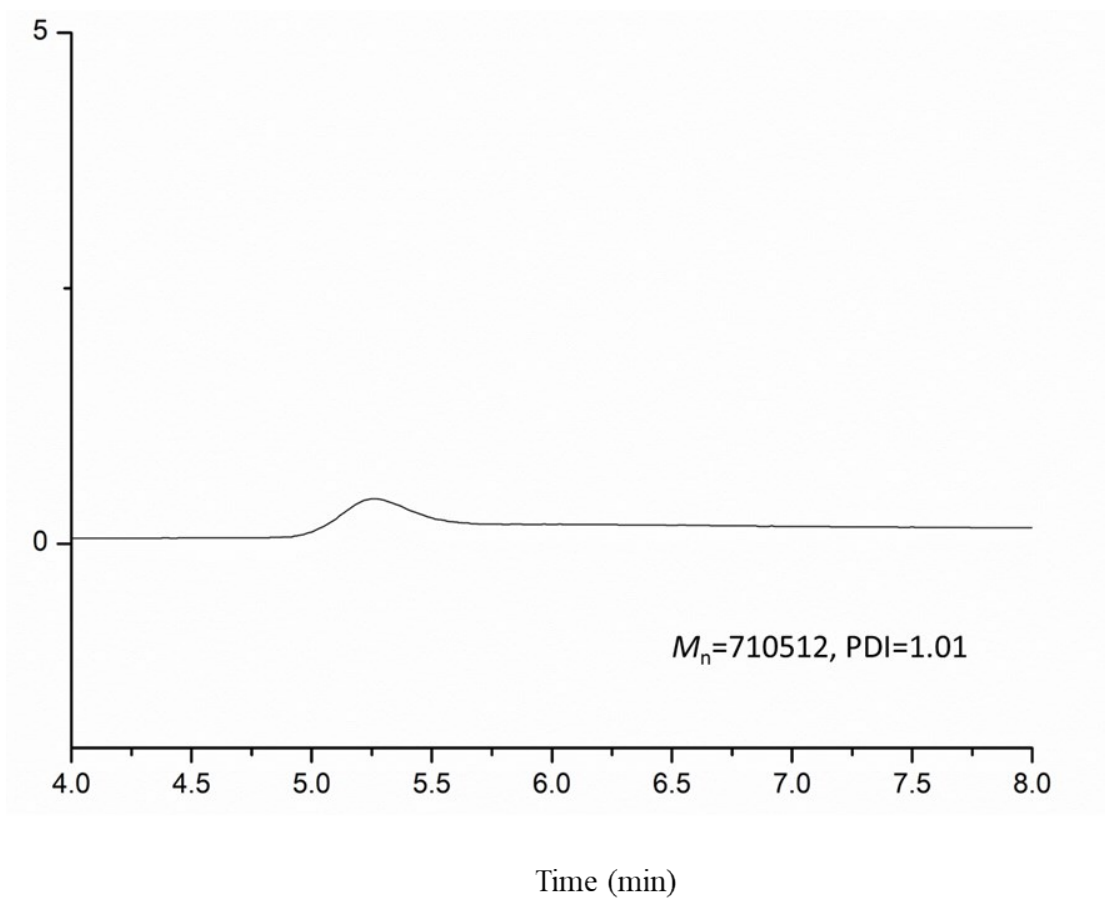

Fig. S23 The GPC curve in THF (Table 2, Entry 7).



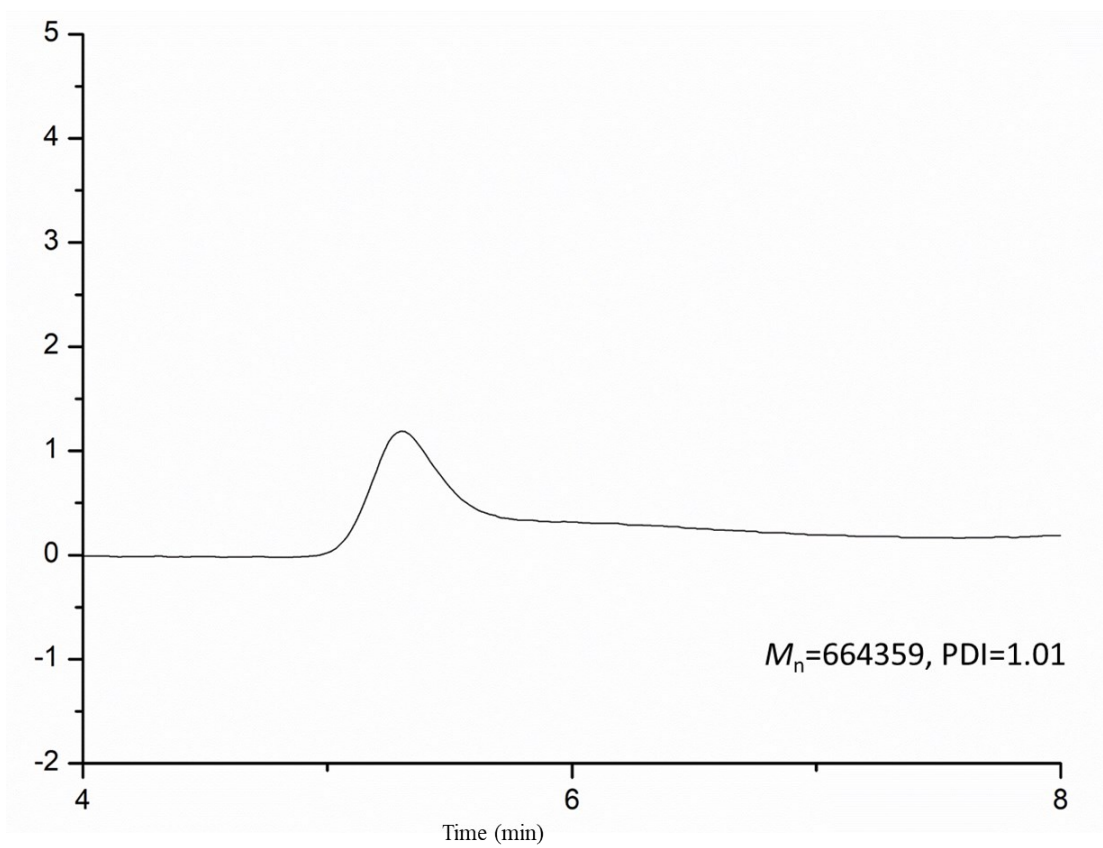

Fig. S24 The GPC curve in THF (Table 2, Entry 11).

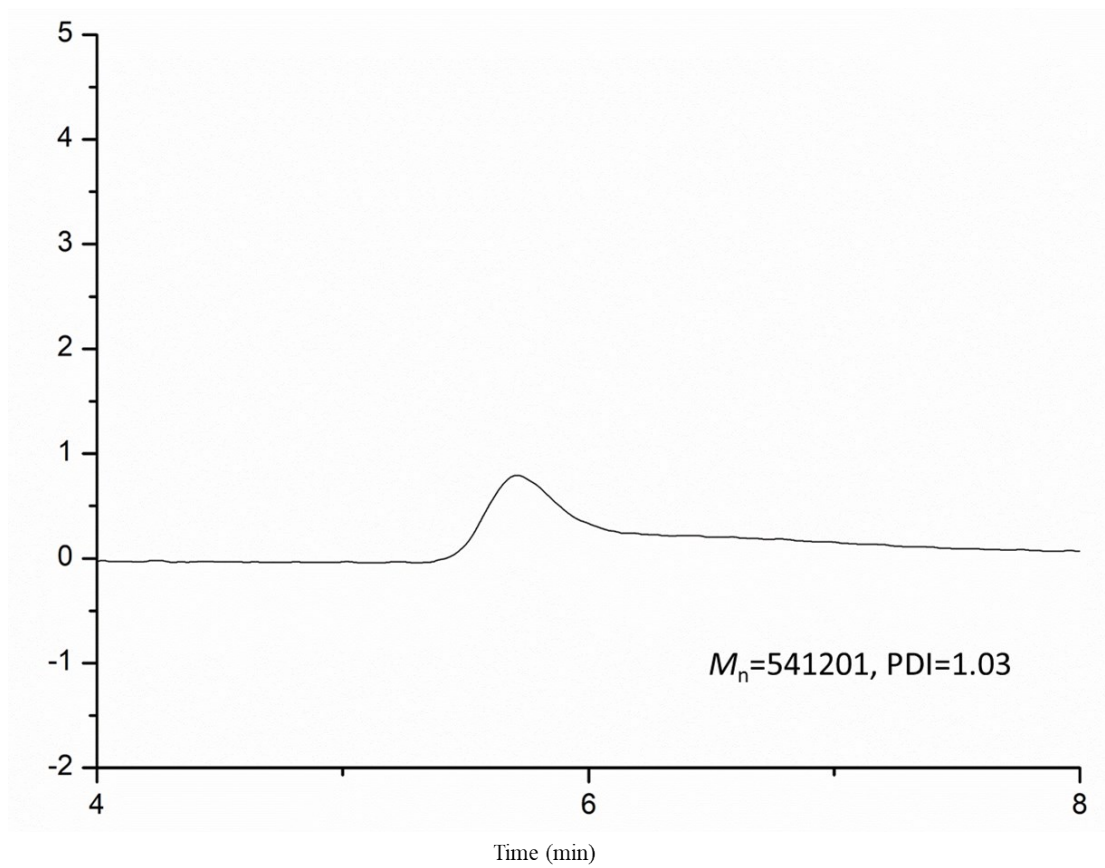

Fig. S25 The GPC curve in THF (Table 2, Entry 13).

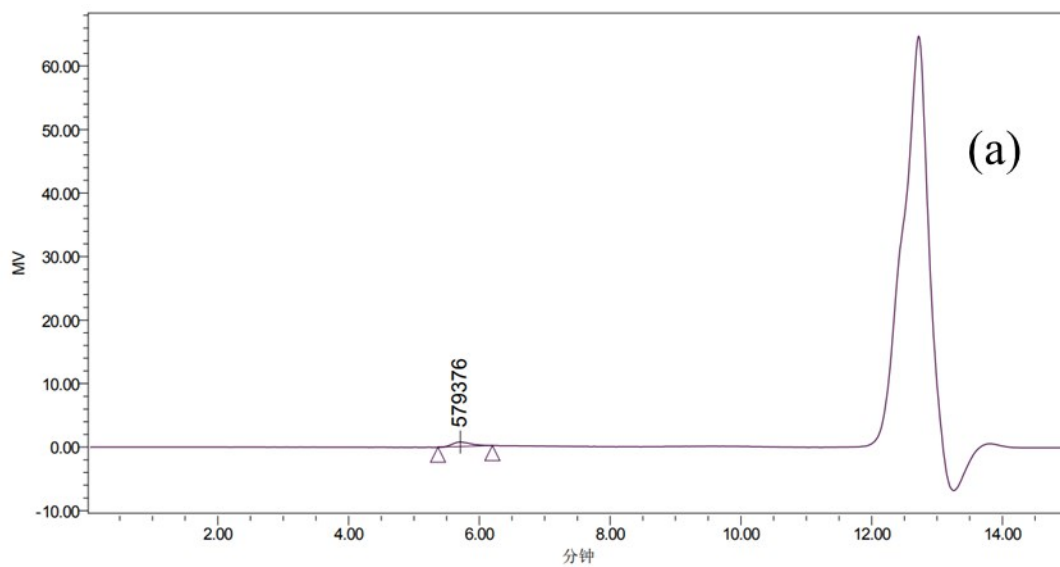

宽分布未知样相对峰表

| 分布名 | Mn<br>(道尔顿) | Mw<br>(道尔顿) | MP     | Mz<br>(道尔顿) | Mz+1<br>(道尔顿) | 多分散性     | Mz/Mw    | Mz+1/Mw  |
|-----|-------------|-------------|--------|-------------|---------------|----------|----------|----------|
| 1   | 541201      | 555173      | 579376 | 568359      | 580653        | 1.025817 | 1.023751 | 1.045895 |

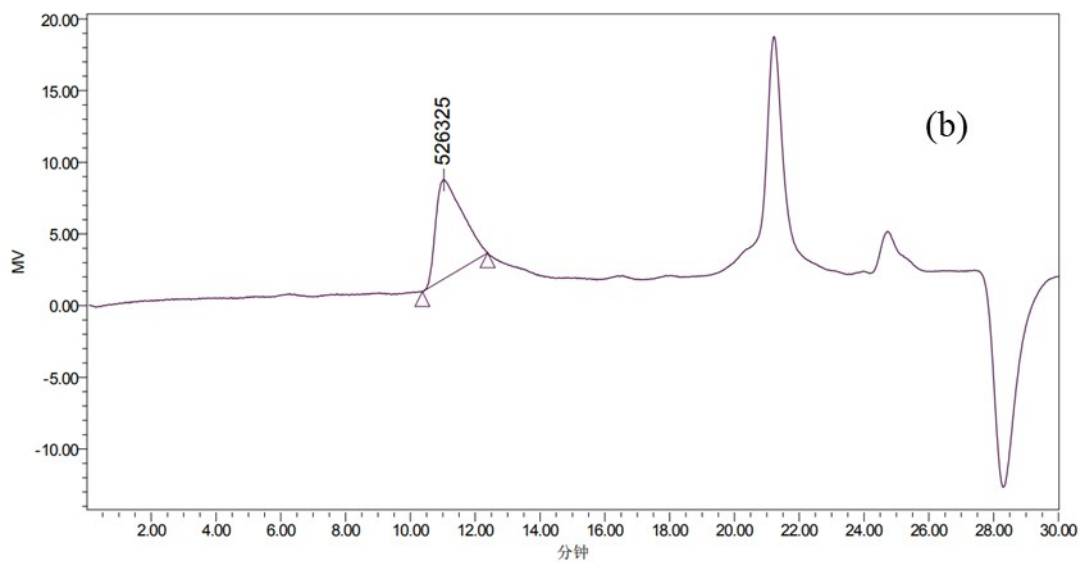

宽分布未知样相对峰表

| 分布名 | Mn<br>(道尔顿) | Mw<br>(道尔顿) | MP     | Mz<br>(道尔顿) | Mz+1<br>(道尔顿) | 多分散性     | Mz/Mw    | Mz+1/Mw  |
|-----|-------------|-------------|--------|-------------|---------------|----------|----------|----------|
| 1   | 336088      | 375577      | 526325 | 411066      | 440331        | 1.117496 | 1.094499 | 1.172409 |

Fig. S26 The GPC curve in THF (a) and CH<sub>2</sub>Cl<sub>2</sub> (b) (Table 2, Entry 13).

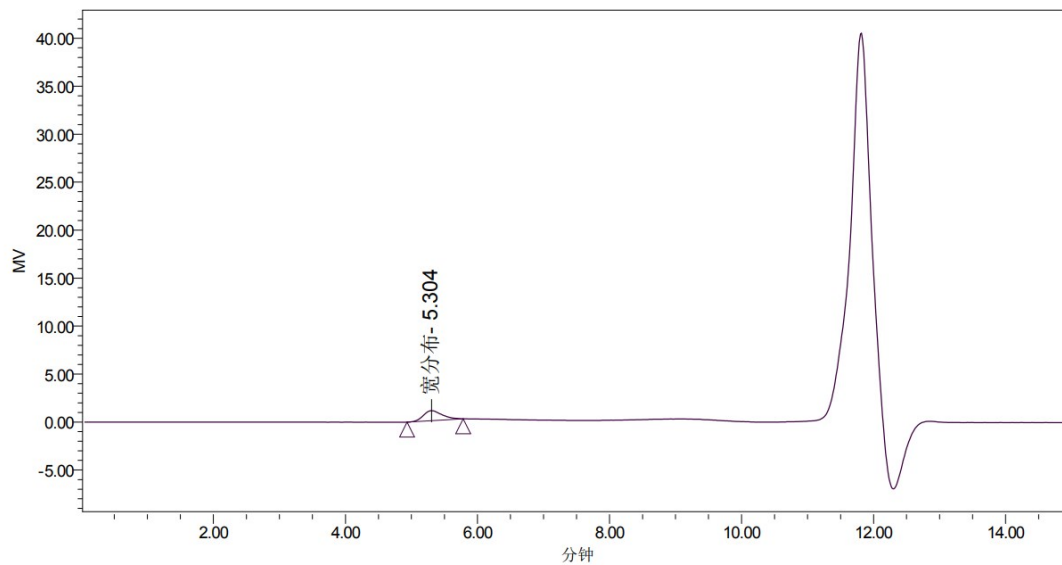

宽分布未知样相对峰表

| 分布名 | Mn<br>(道尔顿) | Mw<br>(道尔顿) | MP | Mz<br>(道尔顿) | Mz+1<br>(道尔顿) | 多分散性     | Mz/Mw    | Mz+1/Mw  |
|-----|-------------|-------------|----|-------------|---------------|----------|----------|----------|
| 1   | 664359      | 667855      |    | 671174      | 674313        | 1.005262 | 1.004970 | 1.009670 |

Fig. S27 The GPC curve in THF (Table 2, Entry 11).

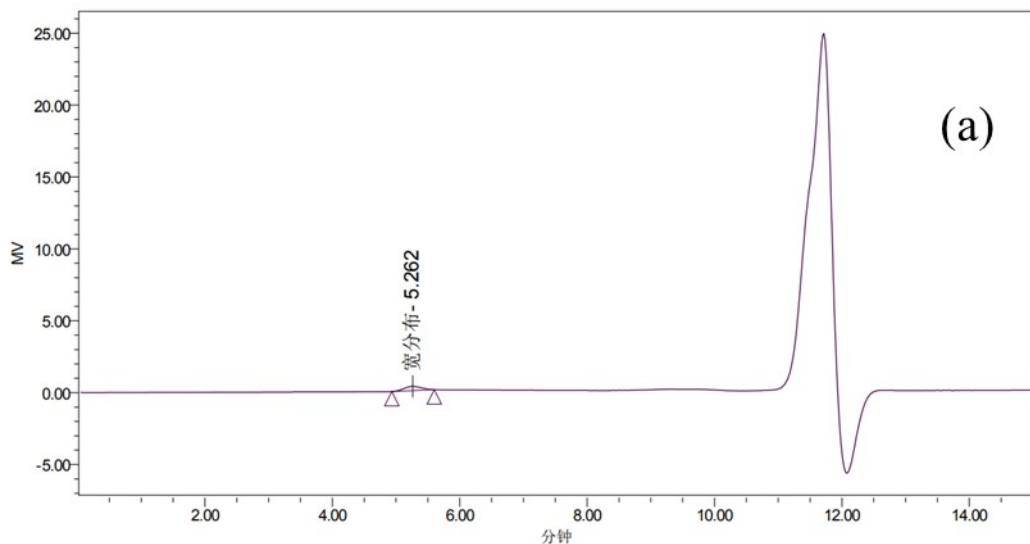

宽分布未知样相对峰表

| 分布名 | Mn<br>(道尔顿) | Mw<br>(道尔顿) | MP | Mz<br>(道尔顿) | Mz+1<br>(道尔顿) | 多分散性     | Mz/Mw    | Mz+1/Mw  |
|-----|-------------|-------------|----|-------------|---------------|----------|----------|----------|
| 1   | 710512      | 710823      |    | 711130      | 711432        | 1.000438 | 1.000432 | 1.000857 |

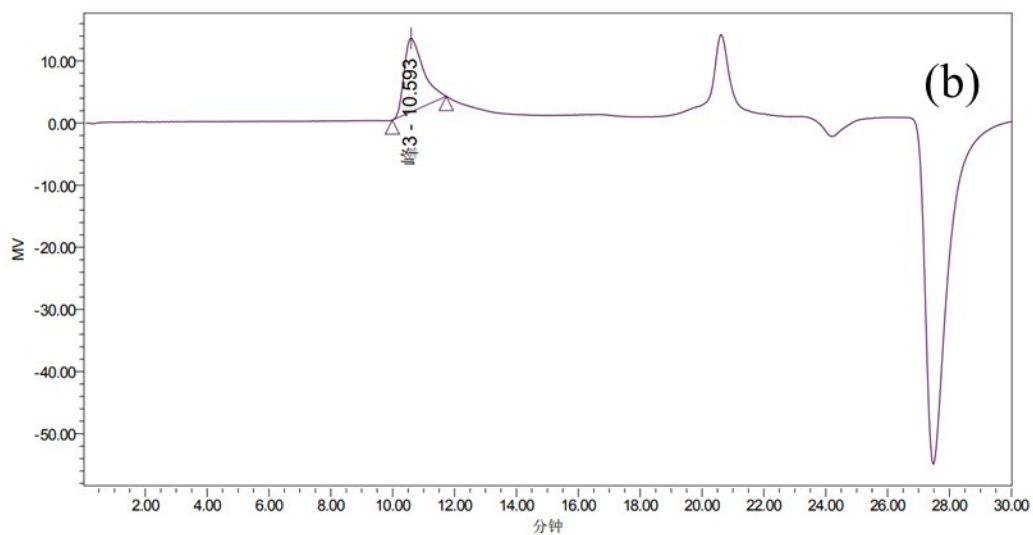

宽分布未知样相对峰表

| 分布名 | Mn<br>(道尔顿) | Mw<br>(道尔顿) | MP | Mz<br>(道尔顿) | Mz+1<br>(道尔顿) | 多分散性     | Mz/Mw    | Mz+1/Mw  |
|-----|-------------|-------------|----|-------------|---------------|----------|----------|----------|
| 1   | 456203      | 475853      |    | 493079      | 507710        | 1.043073 | 1.036202 | 1.066948 |

Fig. S28 The GPC curve in THF (a) and CH<sub>2</sub>Cl<sub>2</sub> (b) (Table 2, Entry 9).

## REFERENCES

- (1). Zhang, B.; Bian, X.; Zhou, D.; Feng, L.; Li, G.; Chen, X. *Rsc Adv.*, 2016, **6**, 113366-113376.
- (2). Li, X.; Duan, R.; Pang, X.; Gao, B.; Wang, X.; Chen, X. *Appl. Catal., B.* 2016, **182**, 580-586.
